# Supplementary material
Source: publisher figshare collection journal article supplement (https://acs.figshare.com/ndownloader/files/13474820)

## Supporting Information

Parallel headspace extraction onto etched sorbent sheets prior to ambient-ionization mass spectrometry for automated, trace-level volatile analyses

Madeleine Y. Bee, Jillian A. Jastrzembski, and Gavin L. Sacks  
Cornell University, Department of Food Science, 411 Tower Road, Ithaca, New York 14853

### Table of Contents

- (S – 1) Cover page
- (S – 2) Figure S-1: Photo of extraction apparatus
- (S – 3) Figure S-2: Photo of SPMESH in positioning stage
- (S – 4) Table S-1: Response surface experimental design
- (S – 5) Table S-2: Well plate orientations for calibration curves & recovery experiments
- (S – 6) Figure S-3: Graphic representation of etched-SPMESH sheet
- (S – 7) Figure S-4: Optimization of bakeout conditions
- (S – 8) Figure S-5: Mass spectrum of SPMESH sheet following bakeout
- (S – 9) Table S-3: ANOVA tables for response surface model
- (S – 10) Figure S-6: Additional response surface plots
- (S – 11) Figure S-7: Calibration curves
- (S – 12) Figure S-8: Robustness data, no internal standard correction

Figure S-1: (top) Disassembled components of SPMESH apparatus. Top right – 24-well plate, bottom right – Teflon gasket, bottom left – bottom stainless steel plate, top left – top stainless steel plate with butterfly nuts and bolts

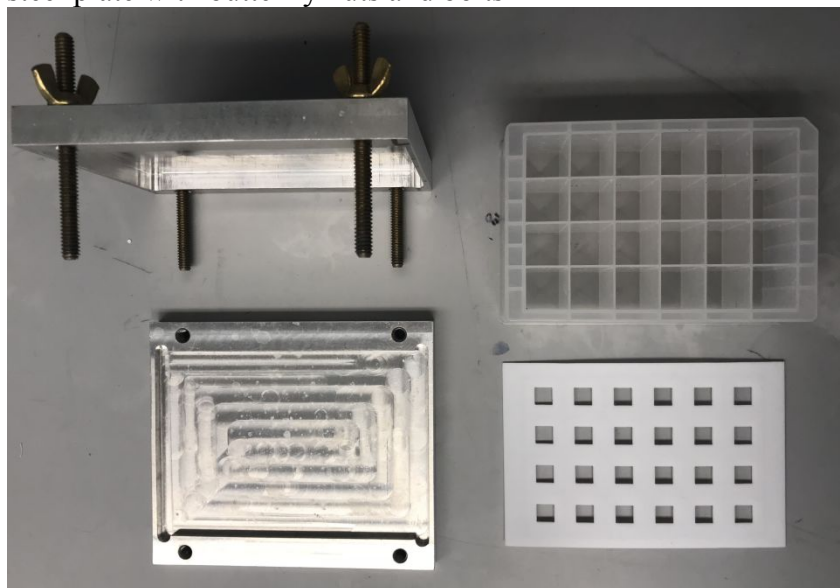

Assembled SPMESH apparatus

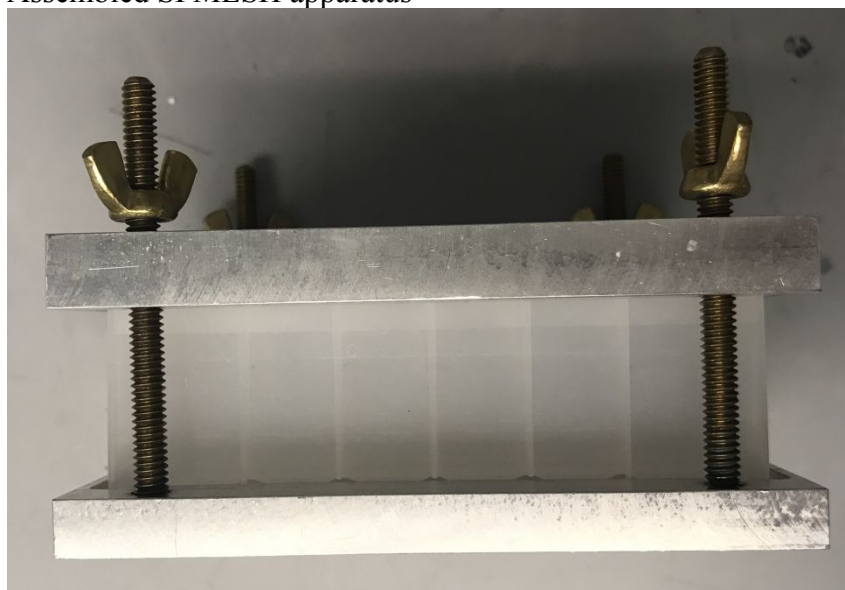

Figure S-2: SPMESH sheet and stainless steel frame, loaded in automated positioning stage in front of the DART source.

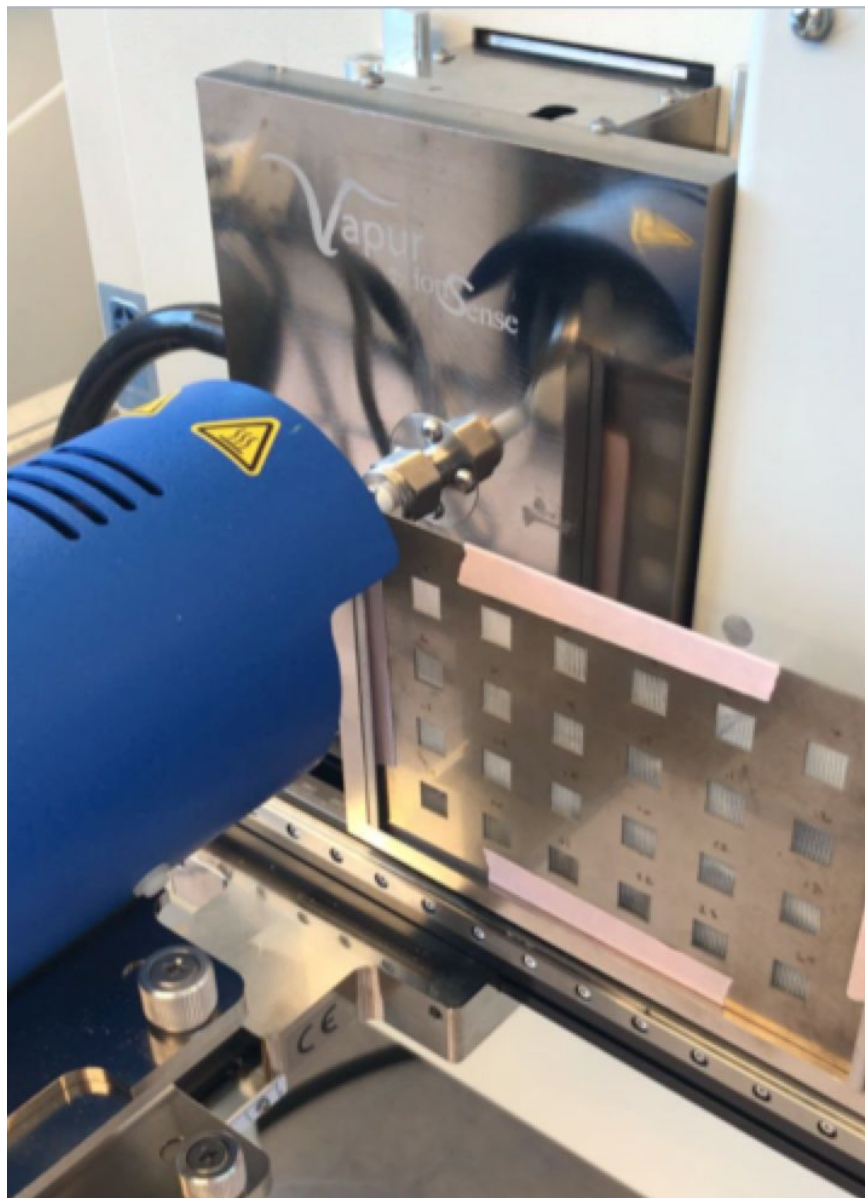

Table S-1: Response surface experimental design for extraction and desorption optimization

| <b>Extraction Temperature (°C)</b> | <b>Extraction Time (min)</b> | <b>Desorption Temperature (°C)</b> | <b>Scan Speed (mm/s)</b> |
|------------------------------------|------------------------------|------------------------------------|--------------------------|
| 30                                 | 15                           | 200                                | 1                        |
| 60                                 | 15                           | 450                                | 0.5                      |
| 30                                 | 15                           | 450                                | 2                        |
| 60                                 | 15                           | 200                                | 0.5                      |
| 50                                 | 60                           | 450                                | 2                        |
| 50                                 | 60                           | 200                                | 0.5                      |
| 60                                 | 15                           | 400                                | 2                        |
| 50                                 | 30                           | 400                                | 1                        |
| 30                                 | 60                           | 450                                | 0.5                      |
| 40                                 | 30                           | 400                                | 1                        |
| 50                                 | 30                           | 300                                | 1                        |
| 40                                 | 60                           | 250                                | 1                        |
| 30                                 | 60                           | 350                                | 2                        |
| 60                                 | 60                           | 350                                | 0.5                      |
| 40                                 | 30                           | 400                                | 1                        |
| 40                                 | 60                           | 250                                | 1                        |
| 40                                 | 30                           | 200                                | 2                        |
| 60                                 | 30                           | 250                                | 1                        |
| 50                                 | 15                           | 250                                | 2                        |
| 60                                 | 60                           | 200                                | 2                        |
| 40                                 | 15                           | 350                                | 0.5                      |
| 30                                 | 30                           | 250                                | 0.5                      |
| 50                                 | 30                           | 400                                | 1                        |

Table S-2: Distribution of blanks and standards in 24 well platers for calibration curves & recovery experiments.

**Calibration Curve -**

Well Plate Setup Run 1:

|      |      |     |     |     |     |
|------|------|-----|-----|-----|-----|
| B    | IS 1 | B   | 5.1 | B   | 2.4 |
| IS 3 | B    | 5.3 | B   | 3.4 | B   |
| B    | 1.1  | B   | 5.2 | B   | 3.3 |
| 3.2  | B    | 4.1 | B   | 2.2 | B   |

Well Plate Setup Run 2:

|     |     |      |     |     |      |
|-----|-----|------|-----|-----|------|
| B   | 4.3 | B    | 4.4 | B   | 1.4  |
| 4.2 | B   | 2.3  | B   | 3.1 | B    |
| B   | 5.4 | B    | 2.1 | B   | IS 4 |
| 1.3 | B   | IS 2 | B   | 1.2 | B    |

**Recovery -**

Well Plate Setup:

|      |     |     |      |      |      |
|------|-----|-----|------|------|------|
| B1   | 1.2 | B2  | IS 1 | B3   | IS 2 |
| IS 4 | 1.3 | 2.4 | 1.4  | GB 3 | 3.1  |
| B4   | 3.4 | 3.2 | GB 2 | IS 3 | 3.3  |
| 1.1  | 2.3 | 2.2 | 2.1  | GB 4 | GB 1 |

B = blank (water)

GB = matrix blank (grape macerate)

IS = internal standard (grape macerate)

Figure S-3: Cartoon of etched SPMESH sheet indicating parallel (a, gray) vs. perpendicular (b, white) edge area.

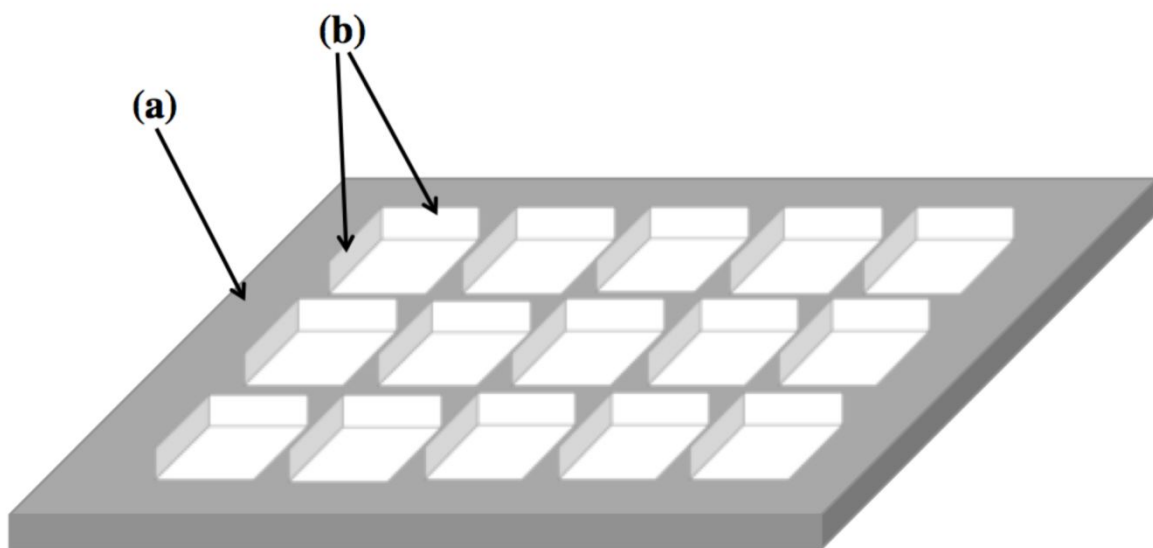

Figure S-4: Results from determining optimum mesh bakeout time at 250 °C. Columns depict average IBMP signal from three replicate runs; error bars indicate the average standard deviation of three replicate runs of three samples; a total of nine replicates.

\*Indicates significant difference ( $p < 0.0001$ )

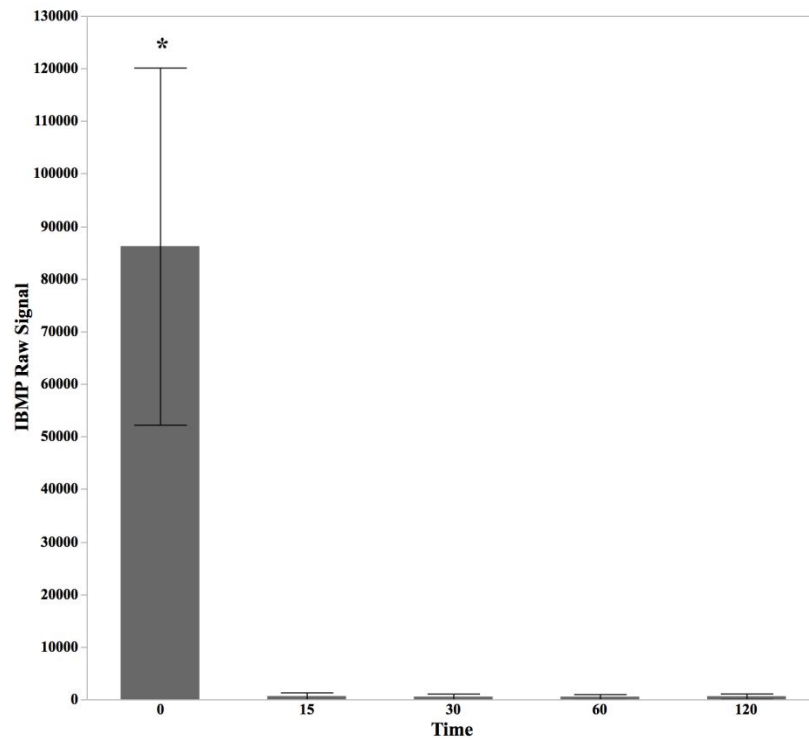

Figure S-5: Full mass spectrum of a single well over mass range 50-200  $m/z$  for a blank mesh

RSMtest\_B #33-50 RT: 0.29-0.43 AV: 18 NL: 1.18E4  
T: FTMS + c NSI Full ms [50.00-200.00]

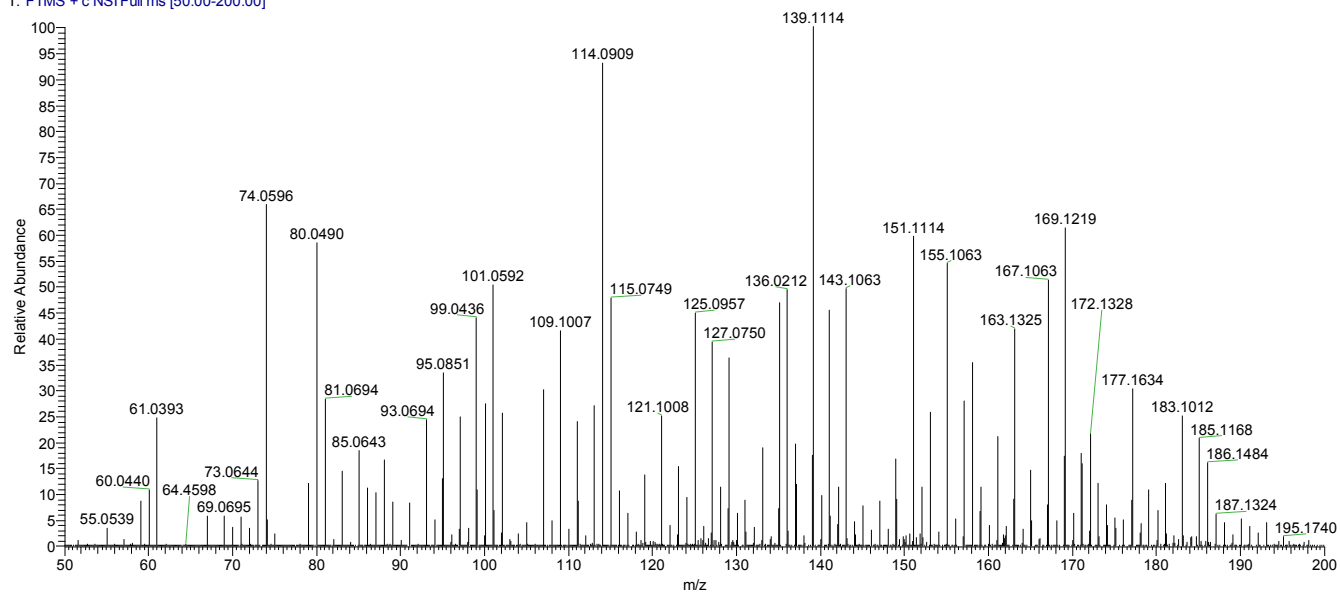



Table S-3: ANOVA tables for RSM models from extraction and optimization experiments.

IBMP:

| Source   | DF | Sum of Squares | Mean Square | F Ratio  |
|----------|----|----------------|-------------|----------|
| Model    | 14 | 1888511299     | 134893664   | 87.9728  |
| Error    | 8  | 12266848.5     | 1533356.1   | Prob > F |
| C. Total | 22 | 1900778148     |             | <.0001*  |

Linalool:

| Source   | DF | Sum of Squares | Mean Square | F Ratio  |
|----------|----|----------------|-------------|----------|
| Model    | 14 | 1.4283e+10     | 1.0202e+9   | 4.6605   |
| Error    | 8  | 1751213408     | 218901676   | Prob > F |
| C. Total | 22 | 1.6034e+10     |             | 0.0174*  |

Methyl anthranilate:

| Source   | DF | Sum of Squares | Mean Square | F Ratio  |
|----------|----|----------------|-------------|----------|
| Model    | 14 | 7.9601e+10     | 5.6858e+9   | 77.3056  |
| Error    | 8  | 588396020      | 73549503    | Prob > F |
| C. Total | 22 | 8.0189e+10     |             | <.0001*  |

Figure S-6: Additional response surface plots for extraction and desorption optimization experiments

IBMP – scan speed vs. desorption temperature

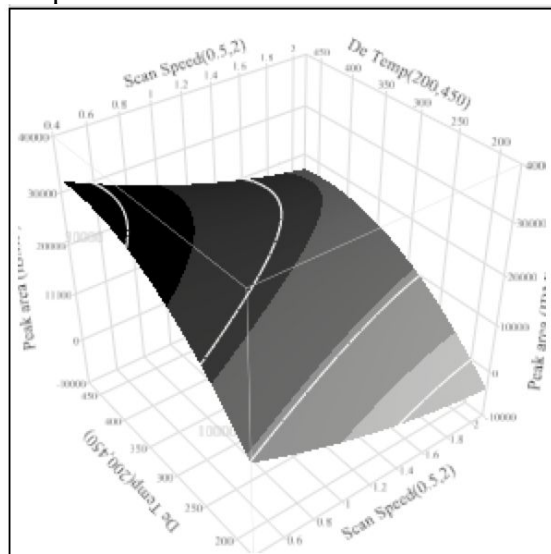

Linalool – extraction time vs. extraction temperature

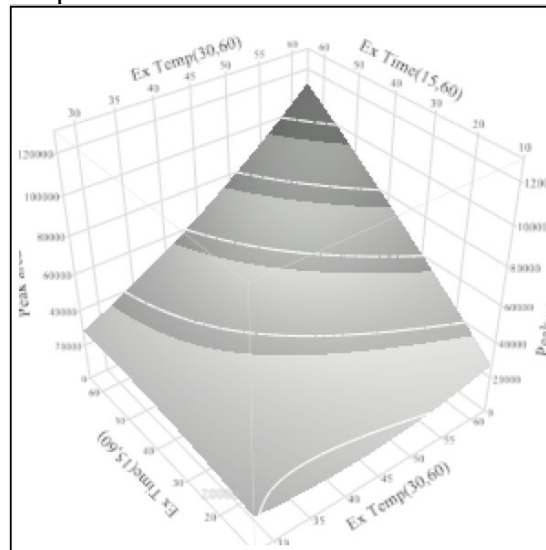

MA – extraction time vs. extraction temperature

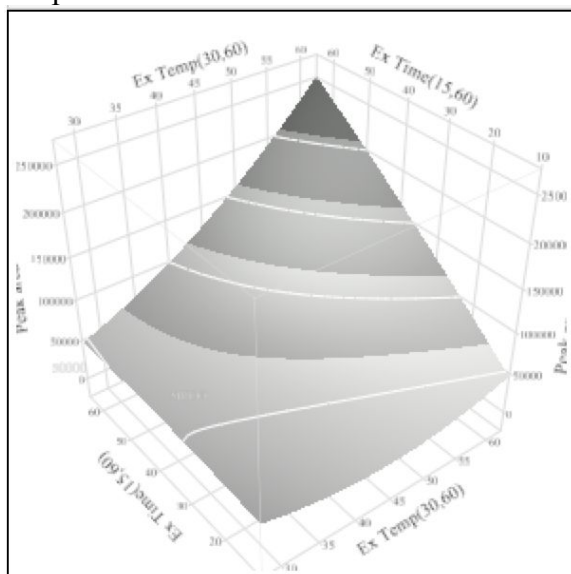

MA – scan speed vs. desorption temperature

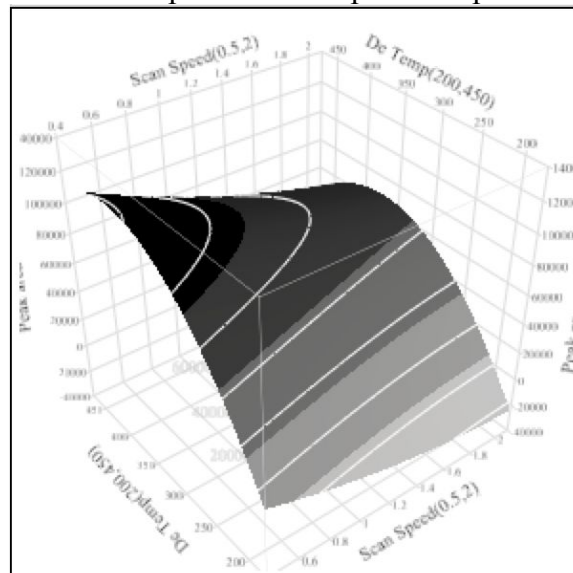

Figure S-7: Sheet-based SPMESH-DART-MS calibration curves for aqueous samples. The internal standard ratio = (peak area of standard)/(peak area of matched internal standard). Points represent the average of four replicates; error bars represent the standard deviation for each level.

### IBMP

\*One outlier removed from the highest concentration (5000 ng/L) IBMP analyses, determined by quantile range outliers in JMP, with tail quantile of 0.1 and Q of 3.

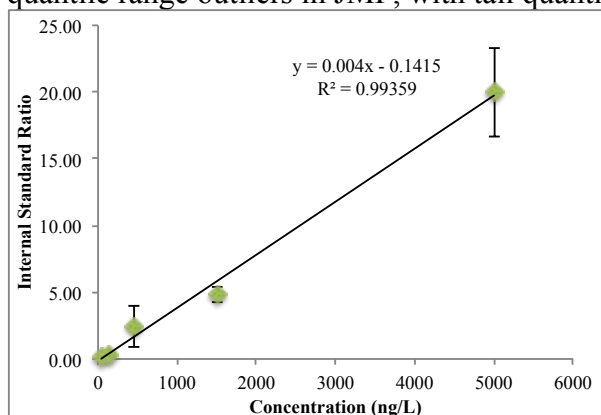

### Linalool

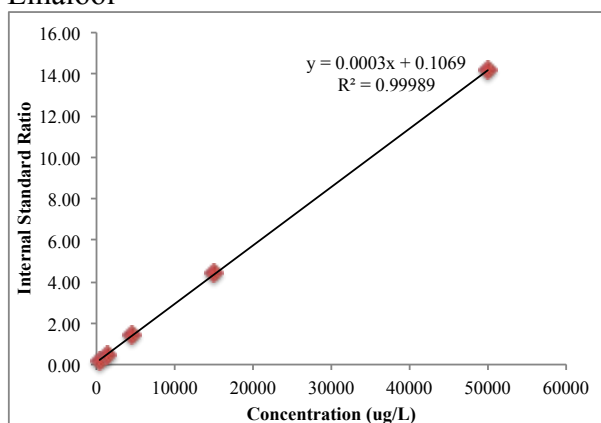

### Methyl anthranilate

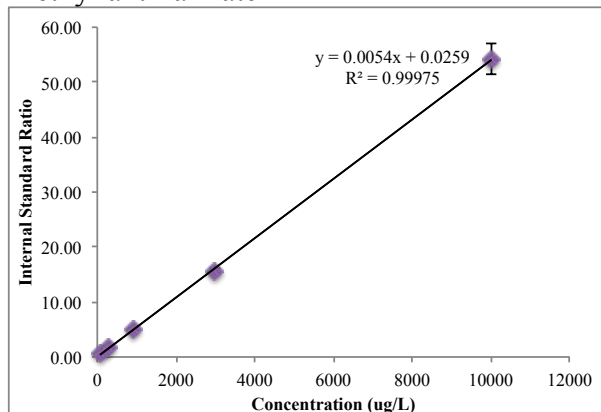

Figure S-8: SPMESH-DART-MS robustness over 20 extractions; raw signal. Wells were loaded with 500 ng/L IBMP, 100 µg/L linalool, 100 µg/L MA, and their deuterated analogs, and samples were run once per day for the first 12 extractions (n = 3 each day); the remaining eight analyses were run on the final day.

New sheet:

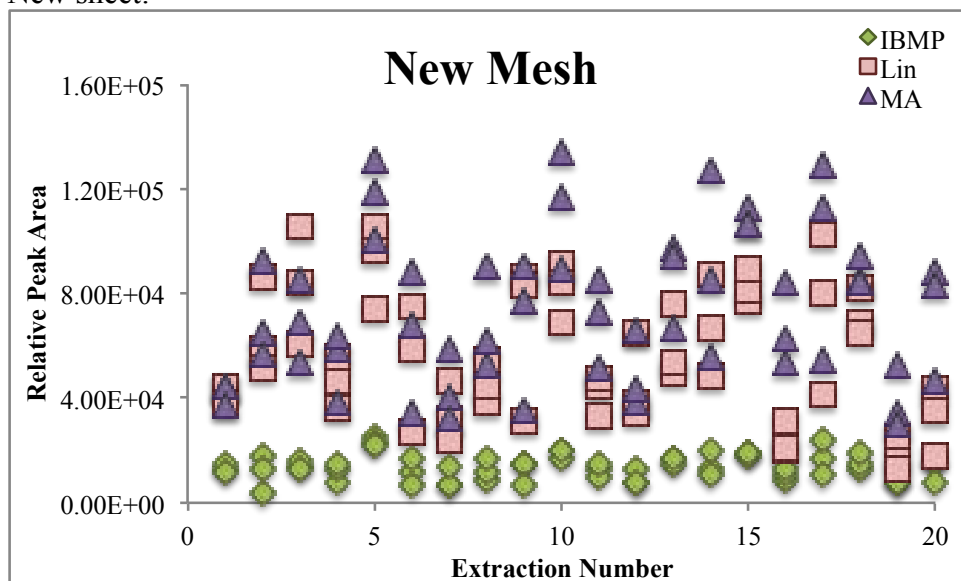

Previously used sheet (~75 extractions):

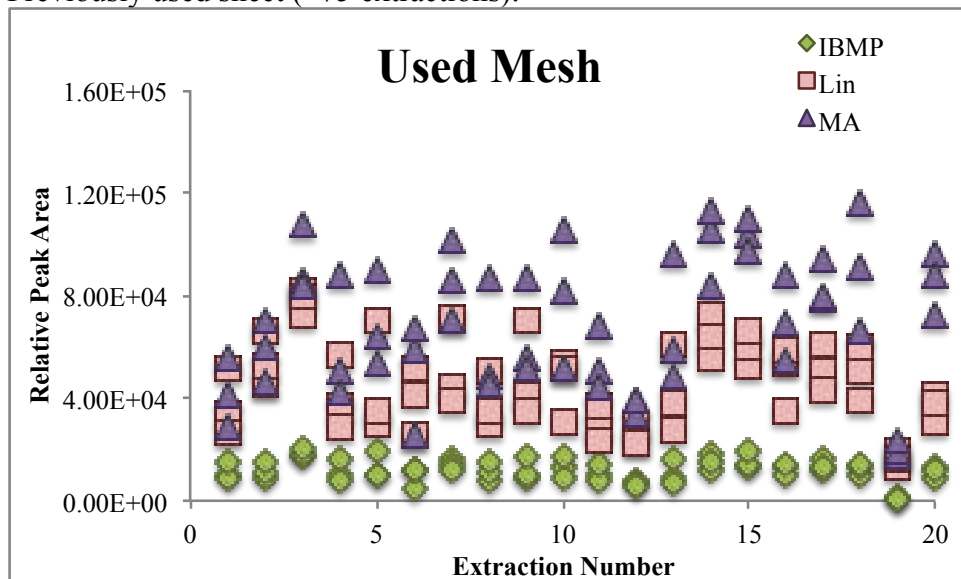

Supplement: Supplementary file 1 [file 13474820]
